# Supplementary material for: Co- and Ni-promoted indium oxide for CO2 hydrogenation to methanol
Source: Royal Society of Chemistry journal article supplement (doi:10.1039/d4cy00301b), 2024-01-01
Supplement: d4cy00301b1.pdf [file d4cy00301b1.pdf]

## Supplementary data

Figure S1 Low-temperature Ar adsorption–desorption isotherms

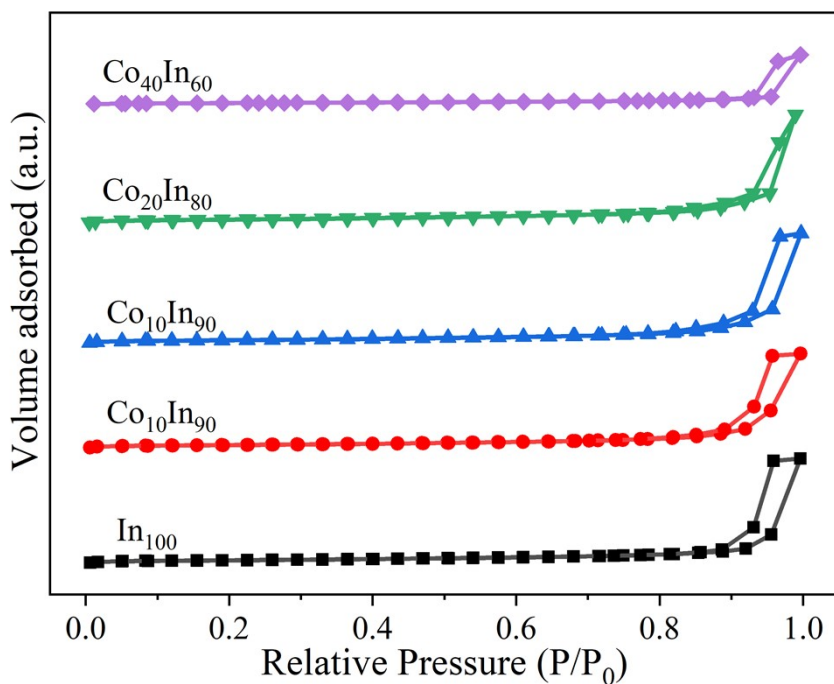

Table S1 Catalyst test results

| □                                     | Temperature<br>(°C) | X <sub>CO2</sub> | S <sub>MeOH</sub> | S <sub>CO</sub> | S <sub>Hydrocarbons</sub> | mmol(MeOH)<br>/g <sub>cat</sub> ·h | mg(MeOH)<br>/g <sub>cat</sub> ·h |
|---------------------------------------|---------------------|------------------|-------------------|-----------------|---------------------------|------------------------------------|----------------------------------|
| <b>Co<sub>05</sub>In<sub>95</sub></b> | 240                 | 0.0102           | 0.9776            | 0.0000          | 0.0224                    | 0.7134                             | 22.8581                          |
|                                       | 260                 | 0.0372           | 0.5754            | 0.4083          | 0.0162                    | 1.5537                             | 49.7796                          |
|                                       | 280                 | 0.0764           | 0.5421            | 0.4456          | 0.0123                    | 3.0714                             | 98.4091                          |
|                                       | 300                 | 0.1014           | 0.3745            | 0.6023          | 0.0231                    | 2.7330                             | 87.5654                          |
| <b>Co<sub>10</sub>In<sub>90</sub></b> | 240                 | 0.0146           | 0.9791            | 0.0000          | 0.0209                    | 1.0314                             | 33.0470                          |
|                                       | 260                 | 0.0470           | 0.6126            | 0.3676          | 0.0199                    | 2.0782                             | 66.5849                          |
|                                       | 280                 | 0.0884           | 0.5612            | 0.4171          | 0.0217                    | 3.6066                             | 115.5559                         |
|                                       | 300                 | 0.1122           | 0.3738            | 0.5898          | 0.0364                    | 3.0308                             | 97.1063                          |
| <b>Co<sub>20</sub>In<sub>80</sub></b> | 240                 | 0.0151           | 0.9801            | 0.0000          | 0.0199                    | 1.0697                             | 34.2716                          |
|                                       | 260                 | 0.0499           | 0.6473            | 0.3351          | 0.0176                    | 2.3444                             | 75.1143                          |
|                                       | 280                 | 0.0896           | 0.5990            | 0.3937          | 0.0073                    | 3.9189                             | 125.5602                         |
|                                       | 300                 | 0.1137           | 0.4058            | 0.5492          | 0.0450                    | 3.3514                             | 107.3773                         |
| <b>Co<sub>40</sub>In<sub>60</sub></b> | 240                 | 0.0130           | 0.9698            | 0.0000          | 0.0302                    | 0.9106                             | 29.1759                          |
|                                       | 260                 | 0.0434           | 0.6652            | 0.3093          | 0.0256                    | 2.1017                             | 67.3389                          |

|                                       |     |        |        |        |        |        |          |
|---------------------------------------|-----|--------|--------|--------|--------|--------|----------|
|                                       | 280 | 0.0795 | 0.5972 | 0.3604 | 0.0424 | 3.4587 | 110.8160 |
|                                       | 300 | 0.1010 | 0.4405 | 0.4937 | 0.0657 | 3.2305 | 103.5047 |
| <b>Co<sub>60</sub>In<sub>40</sub></b> | 240 | 0.0100 | 0.9767 | 0.0000 | 0.0233 | 0.7021 | 22.4962  |
|                                       | 260 | 0.0338 | 0.6588 | 0.2919 | 0.0493 | 1.6095 | 51.5690  |
|                                       | 280 | 0.0652 | 0.6168 | 0.3617 | 0.0215 | 2.9248 | 93.7092  |
|                                       | 300 | 0.0863 | 0.4546 | 0.4755 | 0.0699 | 2.8417 | 91.0483  |
| <b>In<sub>100</sub></b>               | 240 | 0.0033 | 0.9507 | 0.0000 | 0.0493 | 0.2244 | 7.1897   |
|                                       | 260 | 0.0065 | 0.9424 | 0.0000 | 0.0576 | 0.4424 | 14.1744  |
|                                       | 280 | 0.0279 | 0.4204 | 0.5481 | 0.0315 | 0.8501 | 27.2374  |
|                                       | 300 | 0.0532 | 0.4100 | 0.5530 | 0.0370 | 1.5858 | 50.8077  |
| <b>Ni<sub>10</sub>In<sub>90</sub></b> | 240 | 0.0283 | 0.4261 | 0.5683 | 0.0055 | 0.8823 | 28.2693  |
|                                       | 260 | 0.0570 | 0.2334 | 0.7595 | 0.0071 | 0.9727 | 31.1663  |
|                                       | 280 | 0.1176 | 0.1191 | 0.8730 | 0.0080 | 1.0209 | 32.7099  |
|                                       | 300 | 0.1763 | 0.0767 | 0.9121 | 0.0112 | 0.9839 | 31.5251  |
| <b>Ni<sub>20</sub>In<sub>80</sub></b> | 240 | 0.0285 | 0.4105 | 0.5799 | 0.0096 | 0.8555 | 27.4092  |
|                                       | 260 | 0.0460 | 0.2817 | 0.7069 | 0.0114 | 0.9473 | 30.3505  |
|                                       | 280 | 0.0746 | 0.1719 | 0.8144 | 0.0137 | 0.9367 | 30.0132  |
|                                       | 300 | 0.1149 | 0.1157 | 0.8683 | 0.0160 | 0.9690 | 31.0464  |
| <b>Ni<sub>40</sub>In<sub>60</sub></b> | 240 | 0.0201 | 0.4268 | 0.5607 | 0.0125 | 0.6265 | 20.0716  |
|                                       | 260 | 0.0327 | 0.3286 | 0.6521 | 0.0194 | 0.7853 | 25.1617  |
|                                       | 280 | 0.0525 | 0.2390 | 0.7377 | 0.0233 | 0.9157 | 29.3389  |
|                                       | 300 | 0.0821 | 0.1624 | 0.8088 | 0.0287 | 0.9733 | 31.1842  |
